# Supplementary material for: Evaluation of the Efficacy of Immune and Inflammatory Markers in the Diagnosis of Lacrimal-Gland Benign Lymphoepithelial Lesion
Source: Curr Issues Mol Biol. 2023 Mar 1;45(3):2013–20. doi: 10.3390/cimb45030129 (PMC10047269; doi:10.3390/cimb45030129)
Supplement: Supplementary file 1 [file cimb-45-00129-s001.zip › patient information.xlsx]

## Sheet: sheet
No.	Age	Sex	Diagnosis
1	37	female	LGBLEL
2	53	female	LGBLEL
3	40	female	LGBLEL
4	53	female	LGBLEL
5	56	female	LGBLEL
6	39	female	LGBLEL
7	18	male	LGBLEL
8	60	female	LGBLEL
9	54	female	LGBLEL
10	28	male	LGBLEL
11	60	male	LGBLEL
12	56	female	LGBLEL
13	70	male	LGBLEL
14	48	female	LGBLEL
15	45	female	LGBLEL
16	71	female	LGBLEL
17	36	female	LGBLEL
18	61	female	LGBLEL
19	48	female	LGBLEL
20	43	male	LGBLEL
21	32	female	LGBLEL
22	45	male	LGBLEL
23	60	female	LGBLEL
24	41	male	LGBLEL
25	46	female	LGBLEL
26	35	female	LGBLEL
27	49	female	LGBLEL
28	46	male	LGBLEL
29	49	female	LGBLEL
30	23	male	LGBLEL
31	59	female	LGBLEL
32	51	female	LGBLEL
33	57	male	LGBLEL
34	58	male	LGBLEL
35	44	female	LGBLEL
36	58	female	LGBLEL
37	64	female	LGBLEL
38	49	female	LGBLEL
39	36	female	LGBLEL
40	51	female	LGBLEL
41	37	male	LGBLEL
42	57	female	LGBLEL
43	50	female	LGBLEL
44	40	female	LGBLEL
45	34	female	LGBLEL
46	71	male	LGBLEL
47	32	female	LGBLEL
48	46	female	LGBLEL
49	49	female	LGBLEL
50	58	female	LGBLEL
51	61	female	LGBLEL
52	39	male	LGBLEL
53	48	male	LGBLEL
54	25	male	LGBLEL
55	47	female	LGBLEL
56	45	female	LGBLEL
57	34	female	LGBLEL
58	66	female	LGBLEL
59	38	female	LGBLEL
60	66	male	LGBLEL
61	34	female	LGBLEL
62	56	female	LGBLEL
63	55	female	LGBLEL
64	68	female	LGBLEL
65	78	female	LGBLEL
66	31	female	LGBLEL
67	66	female	LGBLEL
68	52	male	LGBLEL
69	63	male	LGBLEL
70	50	female	LGBLEL
71	50	female	LGBLEL
72	50	female	LGBLEL
73	35	female	LGBLEL
74	52	male	LGBLEL
75	52	female	LGBLEL
76	27	female	LGBLEL
77	47	female	LGBLEL
78	40	female	LGBLEL
79	49	female	LGBLEL
80	45	female	LGBLEL
81	54	female	LGBLEL
82	38	female	LGBLEL
83	54	female	LGBLEL
84	50	female	LGBLEL
85	54	male	LGBLEL
86	41	female	LGBLEL
87	51	female	LGBLEL
88	51	female	LGBLEL
89	51	female	LGBLEL
90	26	male	LGBLEL
91	27	male	primary lacrimal prolapse
92	28	female	primary lacrimal prolapse
93	29	female	primary lacrimal prolapse
94	18	female	primary lacrimal prolapse
95	30	female	primary lacrimal prolapse
96	32	male	primary lacrimal prolapse
97	34	female	primary lacrimal prolapse
98	36	female	primary lacrimal prolapse
99	37	female	primary lacrimal prolapse
100	39	female	primary lacrimal prolapse
101	62	female	primary lacrimal prolapse
102	40	female	primary lacrimal prolapse
103	42	female	primary lacrimal prolapse
104	42	male	primary lacrimal prolapse
105	43	female	primary lacrimal prolapse
106	44	female	primary lacrimal prolapse
107	44	female	primary lacrimal prolapse
108	45	female	primary lacrimal prolapse
109	46	female	primary lacrimal prolapse
110	47	female	primary lacrimal prolapse
111	48	female	primary lacrimal prolapse
112	48	female	primary lacrimal prolapse
113	50	female	primary lacrimal prolapse
114	50	male	primary lacrimal prolapse
115	54	female	primary lacrimal prolapse
116	55	female	primary lacrimal prolapse
117	55	female	primary lacrimal prolapse
118	73	female	primary lacrimal prolapse
119	40	female	primary lacrimal prolapse
120	68	male	primary lacrimal prolapse
